# Supplementary material for: Thermo-sensitive C 3 N 4 for efficient photocatalytic degradation of methyl orange
Source: Royal Society of Chemistry journal article supplement (doi:10.1039/d5ra05141j), 2025-01-01
Supplement: d5ra05141j1.pdf [file d5ra05141j1.pdf]

## Supplementary Information

### Thermo-sensitive C<sub>3</sub>N<sub>4</sub> for Efficient Photocatalytic Degradation of Methyl Orange

Xuefeng Zhu,<sup>‡a</sup> Shikai Xue,<sup>‡a,b</sup> Pingyuan Xie,<sup>a</sup> Qingxian Xu,<sup>a</sup> Yingxin Liu,<sup>a</sup> Chengyong  
Li,<sup>a,\*</sup> Qiuju Lu,<sup>a,\*</sup>

*a. College of Biological and Chemical Engineering, Changsha University, Changsha 410022,  
China.*

*b. College of Chemistry and Bioengineering, Guilin University of Technology, Guilin 541004,  
China*

---

<sup>‡</sup> Co-first authorship.

<sup>\*</sup>Corresponding author

E-mail address: lyong92@163.com (Chengyong Li); luqiuju@ccsu.edu.cn (Qiuju Lu)

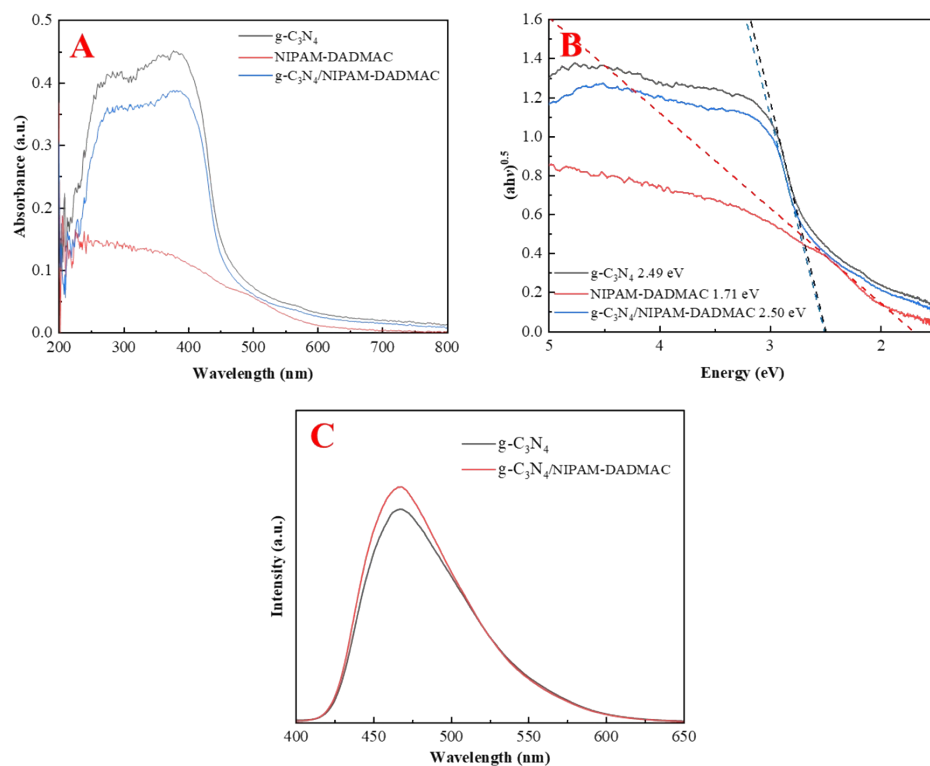

Figure S1 (A) UV-vis diffuse reflection spectra of g-C<sub>3</sub>N<sub>4</sub>, NIPAM-DADMAC, and g-C<sub>3</sub>N<sub>4</sub>/NIPAM-DADMAC, (B) corresponding Tauc plots. (C) Photoluminescence spectra of g-C<sub>3</sub>N<sub>4</sub> and g-C<sub>3</sub>N<sub>4</sub>/NIPAM-DADMAC.

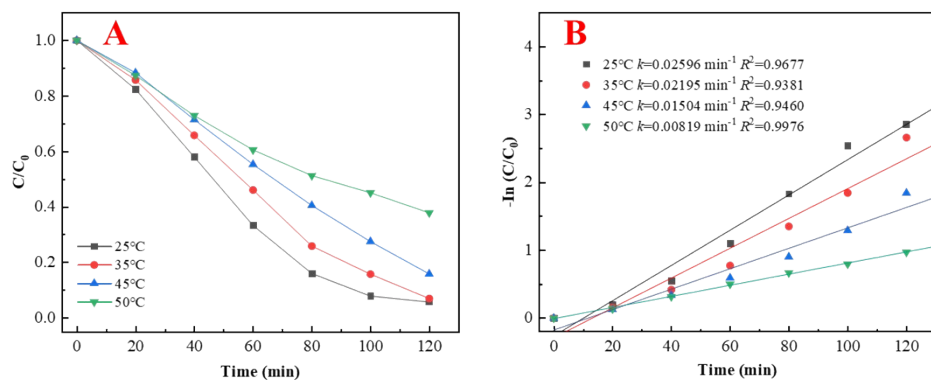

Figure S2 (A)Rhodamine B degradation rate curve, and (B) corresponding photodegradation kinetic curve for g-C<sub>3</sub>N<sub>4</sub>/NIPAM-DADMAC at different degradation temperatures.

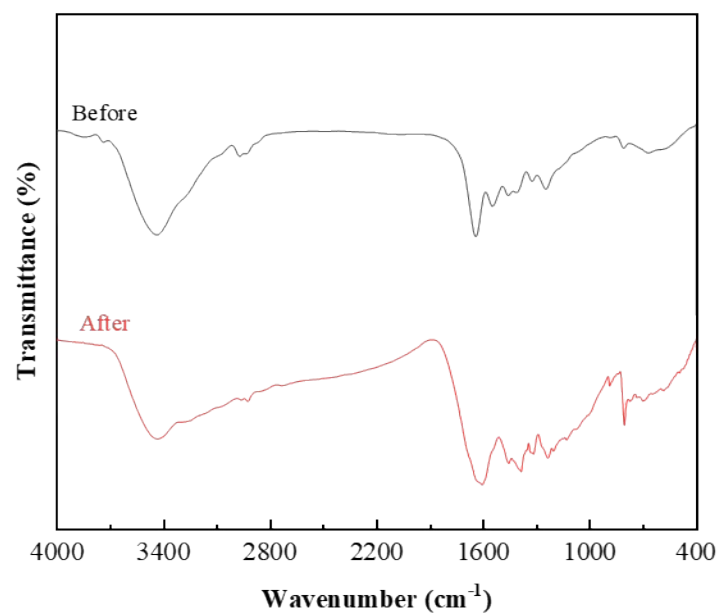

Figure S3 FTIR spectra of g-C<sub>3</sub>N<sub>4</sub>/NIPAM-DADMAC before and after 8 cycles of use.

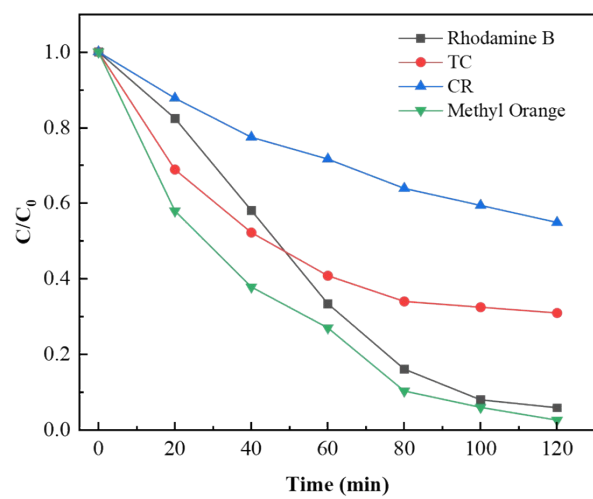

Figure S4 Degradation rate of different pollutants on g- $C_3N_4$ /NIPAM-DADMAC.
